# Supplementary material for: Improved electrical performance of a sol–gel IGZO transistor with high-k Al2O3 gate dielectric achieved by post annealing
Source: Nano Converg. 2019 Jul 22;6:24. doi: 10.1186/s40580-019-0194-1 (PMC6643007; doi:10.1186/s40580-019-0194-1)
Supplement: Supplementary file 1 — Additional file 1: Figure S1. FIB SEM image of the IGZO-based FET device. Figure S2. AFM images of Al2O3 surface (a) before and (b) after post annealing. AFM images of IGZO surface (c) before and (d) after post annealing. Figure S3. (a) Transfer characteristics of IGZO transistor devices with different post annealing temperature (50 ~ 300 °C). Comparison of electrical parameters such as (b) Ion/Ioff, ratio, (c) ΔVth, and (d) mobility for devices treated with different post annealing temperature. Figure S4. Comparison of the transfer curves of the IGZO-based FET devices with different Al2O3 dielectric layer thickness (a) before and (b) after post annealing. Figure S5. Comparison of transfer curves during 5000 cycling test for (a) no annealing and (b) annealing device. Table S1. Comparison of electrical parameters between the IGZO transistor devices without post-annealing and the devices with post-annealing. Table S2. Comparison of processing techniques studied for performance improvement of IGZO/Al2O3 transistor devices. [file 40580_2019_194_MOESM1_ESM.docx]

Additional Information

**Improved electrical performance of a sol–gel IGZO transistor with high-k Al2O3 gate dielectric achieved by post annealing**

Esther Lee1,†, Tae Hyeon Kim1,†, Seung Won Lee2, Jee Hoon Kim1, Jaeun Kim1, Tae Gun Jeong1, Ji-Hoon Ahn2, and Byungjin Cho1,*

1Department of Advanced Material Engineering, Chungbuk National University,

Chungbuk 28644, Republic of Korea

2Department of Electronic Material Engineering, Korea Maritime and Ocean University, Busan 49112, Republic of Korea

*Correspondence: [bjcho@chungbuk.ac.kr](mailto:bjcho@chungbuk.ac.kr)

†Authors contributed equally to this work.

**Figure S1.** FIB SEM image of the IGZO-based FET device.

**Figure S2.** AFM images of Al2O3 surface (a) before and (b) after post annealing. AFM images of IGZO surface (c) before and (d) after post annealing.

**Figure S3.** (a) Transfer characteristics of IGZO transistor devices with different post annealing temperature (50 ~ 300 °C). Comparison of electrical parameters such as (b) Ion/Ioff, ratio, (c) ΔVth, and (d) mobility for devices treated with different post annealing temperature.

**Figure S4.** Comparison of the transfer curves of the IGZO-based FET devices with different Al2O3 dielectric layer thickness (a) before and (b) after post annealing.


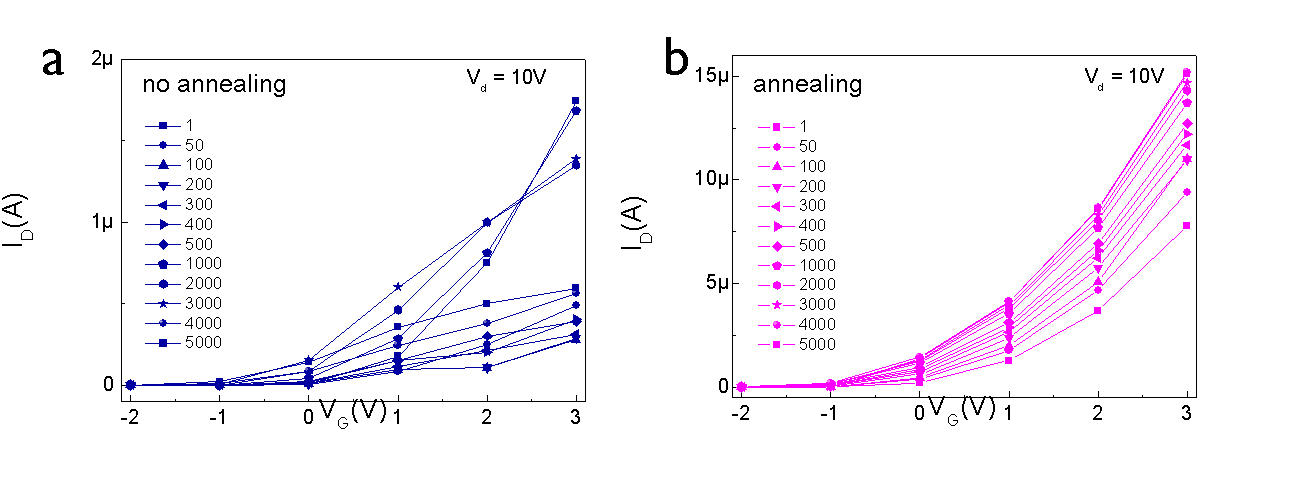


**Figure S5.** Comparison of transfer curves during 5000 cycling test for (a) no annealing and (b) annealing device.

**Table S1.** Comparison of electrical parameters between the IGZO transistor devices without post-annealing and the devices with post-annealing

| Type | VD (V) | | Ion (A) | Ioff (A) | Ion/Ioff | Vth (V) | S.S.  (mV/dec) | μ  (cm2V-1s-1) |
| --- | --- | --- | --- | --- | --- | --- | --- | --- |
| No annealing | | 0.1 | 3.8710-8 | 1.0910-11 | 3.52103 | 0.70 | 206 | 0.16 |
| 2 | 4.8910-7 | 7.65E-10-11 | 6.39103 | 0.44 | 214 | 0.13 |
| Post  annealing | | 0.1 | 1.910-7 | 1.4210-11 | 1.33104 | 0.25 | 165 | 0.90 |
| 2 | 2.8510-6 | 1.1710-10 | 2.42104 | 0.21 | 174 | 0.81 |

**Table S2.** Comparison of processing techniques studied for performance improvement of IGZO/Al2O3 transistor devices

| processing technique | Electrical Parameter | before | after | Ratio (%) | Ref. |
| --- | --- | --- | --- | --- | --- |
| Post annealing | on/off | 3.52E+03 | 1.33E+04 | 278 | This work |
| SS | 206 | 165 | -20 |
| mobility | 0.16 | 0.9 | 462 |
| Al2O3 passivated  by thermal ALD | on/off | 9.59E+06 | 3.67E+04 | -100 | [S1] |
| SS | 250 | 330 | 32 |
| mobility | 8.6 | 10.1 | 17 |
| Al2O3 passivated  by remote plasma ALD | on/off | 9.59E+06 | 4.77E+06 | -0.5 | [S1] |
| SS | 250 | 210 | -16 |
| mobility | 8.6 | 7.8 | 9 |
| HfO2 buffer layer | on/off | 4.77E+06 | 1.32E+07 | 177 | [S1] |
| SS | 210 | 230 | 10 |
| mobility | 7.8 | 8 | 3 |

References

[S1] Y. B. Ko, S. W. Bang, S. J. Lee, S.Y. Park, The effects of a HfO2 bufferlayer on Al2O3-passivatedindium-gallium-zinc-oxide thin film transistors. Phys. Status solidi. 10-11. 403405 (2011)
